# Supplementary material for: The effects of health behaviours and beliefs based on message framing among patients with chronic diseases: a systematic review
Source: PubMed Central journal article supplement — BMJ Open. 2022 Jan 6;12(1):e055329. doi: 10.1136/bmjopen-2021-055329 (PMC8739424; doi:10.1136/bmjopen-2021-055329), 2022-01-06
Supplement: bmjopen-2021-055329supp003.pdf [file bmjopen-2021-055329supp003.pdf]

**Supplementary file 3: Summary of findings of studies included in this systematic review.**

| Authors<br>Year                | Outcome measures and collection time                                                                                                                                                                                                                                                      | Main findings                                                                                                                                                                                                                                          | Mediators/Moderators                                                                                                                                                                                                                                  |
|--------------------------------|-------------------------------------------------------------------------------------------------------------------------------------------------------------------------------------------------------------------------------------------------------------------------------------------|--------------------------------------------------------------------------------------------------------------------------------------------------------------------------------------------------------------------------------------------------------|-------------------------------------------------------------------------------------------------------------------------------------------------------------------------------------------------------------------------------------------------------|
| Park <sup>32</sup><br>2020     | Attitudes, perceived control and intentions for diabetes self-care behavior.<br>All measured at post-intervention.                                                                                                                                                                        | Attitudes: Loss-framed group improved more;<br>Perceived control: Loss-framed group improved more;<br>Intentions: Both conditions produced significant increases, but no group difference.                                                             | Significant indirect effect of message framing on intentions for diabetes self-care behavior mediated through attitudes and perceived control.<br>No significant interaction effects were observed between health literacy level and message framing. |
| Paragas <sup>33</sup><br>2019  | Diabetes self-management knowledge and self-efficacy.<br>All measured at pre- and post-intervention.                                                                                                                                                                                      | Knowledge: Both loss-framed and gain framed group improved more, but no difference between the two;<br>Self-efficacy: Both loss- and gain- framed group improved, and gain framed group improved more.                                                 | NR                                                                                                                                                                                                                                                    |
| Keyworth <sup>34</sup><br>2018 | Self-care behavior intention.<br>Measured at post-intervention.                                                                                                                                                                                                                           | Intention: Messages focused on short-term health risk, gain-framed messages more persuasive than loss-framed messages; messages about long-term health risk, loss-framed message more persuasive than gain-framed message                              | A significant frame by focus interaction was found for behavioral intention to reduce alcohol intake.                                                                                                                                                 |
| Li <sup>35</sup><br>2017       | PA.<br>Measured at pre-intervention and 2-week follow up: PA.                                                                                                                                                                                                                             | PA: Loss-framed group improved more.                                                                                                                                                                                                                   | NR                                                                                                                                                                                                                                                    |
| Hirschey <sup>36</sup><br>2016 | PA, attitudes, subjective norms, perceived behavioral control, intention.<br>PA and intention were measured at pre- and post-intervention, 1-and 12-months follow up;<br>Attitudes, subjective norms and perceived behavioral control measured at pre-intervention and 1-month follow up. | PA: Both conditions produced significant increases in PA, with no differences between framing conditions;<br>TPB constructs: Neither the gain- nor loss-framed brochures produced significant changes from baseline to the 1- and 12-months follow-up. | NR                                                                                                                                                                                                                                                    |
| Bassett <sup>37</sup><br>2013  | PA response efficacy and intention.<br>All measured at pre- and post-intervention.                                                                                                                                                                                                        | LTPA response efficacy: Loss-framed condition increased more than gain-framed and control conditions, no difference                                                                                                                                    | NR                                                                                                                                                                                                                                                    |

|                             |                                                                                                                                                                                                                                                                              |                                                                                                                                                                                                                                                               |                                                                                                                                                                                                                                                                                                                                               |
|-----------------------------|------------------------------------------------------------------------------------------------------------------------------------------------------------------------------------------------------------------------------------------------------------------------------|---------------------------------------------------------------------------------------------------------------------------------------------------------------------------------------------------------------------------------------------------------------|-----------------------------------------------------------------------------------------------------------------------------------------------------------------------------------------------------------------------------------------------------------------------------------------------------------------------------------------------|
|                             |                                                                                                                                                                                                                                                                              | between gain-framed and control conditions;<br>Intention: Loss-framed condition increased more than gain-framed and control conditions, no difference between gain-framed and control conditions.                                                             |                                                                                                                                                                                                                                                                                                                                               |
| Zhao <sup>38</sup><br>2012  | Medicine adherence intention and attitude.<br>All measured at post-intervention.                                                                                                                                                                                             | Intention: Gain- and loss-framed messages improved more than control, no difference between gain- and loss-framed conditions;<br>Attitude: Gain- and loss-framed messages improved more than control, no difference between gain- and loss-framed conditions. | Significant interaction between frames and CFC, among high-CFC patients, both gain- and loss-framed messages heightened intention and attitude with respect to the no-message control, gain frame showed a consistent superior to the loss frame.<br>Message exposure had no effect on the two outcomes for low- and medium-CFC participants. |
| Trupp <sup>39</sup><br>2011 | Adherence to CPAP, self-efficacy.<br>CPAP use was measured at post-intervention;<br>Self-efficacy was measured at pre- and post-intervention.                                                                                                                                | CPAP use: Loss-framed group improved more;<br>Self-efficacy: Both conditions improved, Loss-framed group improved more than gain-framed group.                                                                                                                | NR                                                                                                                                                                                                                                                                                                                                            |
| Janke <sup>40</sup><br>2011 | Knowledge, pain self-efficacy, pain readiness to change, pain self-management behavioral skills.<br>Pain self-efficacy, pain readiness to change were measured at pre-intervention;<br>Knowledge, pain self-management behavioral skills were measured at post-intervention. | Knowledge: Loss-framed group improved more;<br>Confidence to practice relaxation: Loss-framed group improved more.                                                                                                                                            | Pain self-efficacy, pain readiness to change and message frame independently influenced motivation to engage in relaxation.<br>There were no observed interactions between message frame and either self-efficacy or readiness to change.                                                                                                     |
| Grady <sup>23</sup><br>2011 | Knowledge, attitude, foot care behaviors.<br>Knowledge and attitude were measured at pre- and post-intervention, 3- and 6-month follow-ups;<br>Foot care behaviors were measured at pre-intervention, 3- and 6-month follow-ups.                                             | Foot care behaviors: Gain-framed group improved more.                                                                                                                                                                                                         | Attitude and framing are significant predictors of 6-months behavior, gain framing positively related to long-term behavior; knowledge affects attitudes, in turn, attitudes affect behavior.                                                                                                                                                 |

|                              |                                                                                                                                                                                                                                  |                                                                                                                                                                                                                                                                                                                                                                                                                                                                |                                                                         |
|------------------------------|----------------------------------------------------------------------------------------------------------------------------------------------------------------------------------------------------------------------------------|----------------------------------------------------------------------------------------------------------------------------------------------------------------------------------------------------------------------------------------------------------------------------------------------------------------------------------------------------------------------------------------------------------------------------------------------------------------|-------------------------------------------------------------------------|
| McCall <sup>41</sup><br>2004 | Adherence to exercise, health belief cognitions (perceived susceptibility, benefits and barriers).<br>Adherence to exercise was measured at 3-months follow-ups;<br>Health belief cognitions were measured at post-intervention. | Adherence to exercise: Gain-framed condition attended more exercise sessions than control; loss-framed group attend more exercise, but no difference with control;<br>Perceived susceptibility: Gain- and loss-framed conditions perceived more susceptibility than control;<br>Perceived barriers: Loss-framed condition perceived greater barriers than gain-framed and control conditions;<br>Perceived benefits: No difference among the three conditions. | HBM constructs did not mediate the effects of the educational messages. |
|------------------------------|----------------------------------------------------------------------------------------------------------------------------------------------------------------------------------------------------------------------------------|----------------------------------------------------------------------------------------------------------------------------------------------------------------------------------------------------------------------------------------------------------------------------------------------------------------------------------------------------------------------------------------------------------------------------------------------------------------|-------------------------------------------------------------------------|

Abbreviations: CFC: Consideration of future consequences; CPAP: Continuous positive airway pressure; HBM: Health belief model; LTPA: Leisure time physical activity; NR: Not report; PA: Physical activity; TPB: Theory of planned behavior.
